# Supplementary material for: RclS Sensor Kinase Modulates Virulence of Pseudomonas capeferrum
Source: MDPI journal article supplement (doi:10.3390/ijms23158232), 2022-07-26
Supplement: s1 [file s1]

Table S3. Primers used in RT-qPCR

| Primer    | Sequence (5'-3')         | Length (bp) | Reference  |
|-----------|--------------------------|-------------|------------|
| BepC1 Fw  | GCGTGGCGGCTACTACCCTTCCG  | 169         | This study |
| BepC1 Rev | GCCGTCGAACAGCATCTGGCGC   |             |            |
| MdtB1 Fw  | CGGAAACCATGGCCTCGTCGG    | 178         |            |
| MdtB1 Rev | GCGGTGTTGATCGCGGCCTGG    |             |            |
| PtlHFw    | GGGTAAGCCAATGCAACACATCGG | 187         |            |
| PtlH Rev  | GGCGAACGTGGCGGCGCGGACC   |             |            |
| LgrDFw    | CGGTGTACTGGGCGATACCC     | 140         |            |
| LgrD Rev  | GGGACAGGCCCATGTGCG       |             |            |
| DdaFFw    | GCGTTAAGCGGTTGTCTGAAGC   | 165         |            |
| DdaF Rev  | GCGCATCGGAAAACCTTAATACCC |             |            |
| RsaLFw    | CGCCTGGGCCTCAAGCAGAGCC   | 154         |            |
| RsaL Rev  | GGTCGCTTTCCTCCAGGCGACCGC |             |            |
| LasIFw    | GCGCAACGCCACCGCACGCTCG   | 153         |            |
| LasI Rev  | GCGATCGTCAGCTATGCC       |             |            |
| LasRFw    | CCGCCATCTGGCGCGAGCTGACC  | 169         |            |
| LasR Rev  | CCACACCCGTGCACCTGACGAGC  |             |            |
| RpoDFw    | GCGTGAAATGGGTACTGTCTGAGC | 134         | [7]        |
| RpoD Rev  | CGCTGAGAATGTAGTCG        |             |            |
